# Supplementary material for: Trinucleotide cassettes increase diversity of T7 phage-displayed peptide library
Source: PubMed Central journal article supplement (PMC2174457; doi:10.1186/1472-6750-7-65), 2007-10-05
Supplement: 1472-6750-7-65-S1.pdf [file 1472-6750-7-65-S1.pdf]

**Additional Table 1.** Observed positional amino acid frequencies for the 441-member M13 NNK library peptide population. Position 1 corresponds to the amino-terminus of the peptides. Expected positional amino acid frequencies were calculated based on amino acid codon frequency in the NNK-randomized reduced 32-codon genetic code and on the total number of peptides analyzed (amino acid codon frequency x number of peptides analyzed). Ranges for expected amino acid frequencies were calculated assuming Poisson statistics (square root of expected frequency %). Over-represented amino acids are highlighted in red, and under-represented amino acids are highlighted in blue. Portions of this table were reproduced with kind permission from Wiley-VCH Verlag GmbH & Co. KGaA, see acknowledgements section for details.

| AA | #1 | #2 | #3 | #4 | #5 | #6 | #7 | #8 | #9 | #10 | #11 | #12 | Expected |
|----|----|----|----|----|----|----|----|----|----|-----|-----|-----|----------|
| A  | 45 | 27 | 31 | 31 | 20 | 23 | 31 | 37 | 37 | 29  | 30  | 32  | 28 ± 11  |
| C  | 3  | 1  | 2  | 1  | 1  | 0  | 5  | 0  | 2  | 3   | 1   | 1   | 14 ± 8   |
| D  | 18 | 17 | 19 | 19 | 24 | 17 | 8  | 8  | 7  | 23  | 12  | 9   | 14 ± 8   |
| E  | 19 | 16 | 17 | 11 | 14 | 11 | 6  | 10 | 3  | 4   | 8   | 3   | 14 ± 8   |
| F  | 11 | 8  | 14 | 7  | 7  | 15 | 6  | 15 | 14 | 13  | 9   | 7   | 14 ± 8   |
| G  | 25 | 15 | 5  | 15 | 14 | 12 | 16 | 17 | 19 | 22  | 23  | 19  | 28 ± 11  |
| H  | 25 | 21 | 23 | 32 | 25 | 34 | 27 | 15 | 20 | 19  | 16  | 22  | 14 ± 8   |
| I  | 18 | 22 | 18 | 13 | 15 | 14 | 13 | 10 | 8  | 13  | 11  | 6   | 14 ± 8   |
| K  | 6  | 14 | 10 | 18 | 17 | 19 | 7  | 6  | 4  | 10  | 14  | 6   | 14 ± 8   |
| L  | 40 | 38 | 36 | 44 | 32 | 43 | 46 | 44 | 53 | 46  | 39  | 52  | 41 ± 14  |
| M  | 11 | 14 | 20 | 13 | 11 | 12 | 18 | 15 | 6  | 12  | 15  | 8   | 14 ± 8   |
| N  | 34 | 19 | 21 | 27 | 21 | 25 | 20 | 14 | 9  | 8   | 11  | 11  | 14 ± 8   |
| P  | 1  | 71 | 48 | 49 | 55 | 52 | 60 | 64 | 74 | 61  | 74  | 76  | 28 ± 11  |
| Q  | 26 | 17 | 22 | 20 | 34 | 21 | 21 | 24 | 27 | 17  | 27  | 13  | 28 ± 11  |
| R  | 10 | 17 | 15 | 17 | 24 | 15 | 30 | 31 | 31 | 25  | 33  | 35  | 41 ± 14  |
| S  | 55 | 51 | 55 | 47 | 43 | 42 | 35 | 57 | 40 | 48  | 42  | 54  | 41 ± 14  |
| T  | 42 | 45 | 46 | 41 | 39 | 54 | 50 | 32 | 41 | 38  | 38  | 33  | 28 ± 11  |
| V  | 16 | 12 | 22 | 10 | 21 | 9  | 20 | 14 | 19 | 20  | 19  | 21  | 28 ± 11  |
| W  | 11 | 4  | 3  | 5  | 9  | 4  | 10 | 15 | 7  | 17  | 7   | 21  | 14 ± 8   |
| Y  | 25 | 12 | 14 | 21 | 15 | 19 | 12 | 13 | 20 | 13  | 12  | 12  | 14 ± 8   |
