# Supplementary material for: Trinucleotide cassettes increase diversity of T7 phage-displayed peptide library
Source: PubMed Central journal article supplement (PMC2174457; doi:10.1186/1472-6750-7-65), 2007-10-05
Supplement: 1472-6750-7-65-S2.pdf [file 1472-6750-7-65-S2.pdf]

**Additional Table 2.** Observed positional amino acid frequencies for the 321-member T7 NNK library peptide population. Position 1 corresponds to the amino-terminus of the peptides. Expected positional amino acid frequencies were calculated based on amino acid codon frequency in the NNK-randomized reduced 32-codon genetic code and on the total number of peptides analyzed (amino acid codon frequency x number of peptides analyzed). Ranges for expected amino acid frequencies were calculated assuming Poisson statistics (square root of expected frequency %). Over-represented amino acids are highlighted in red, and under-represented amino acids are highlighted in blue. Portions of this table were reproduced with kind permission from Wiley-VCH Verlag GmbH & Co. KGaA, see acknowledgements section for details.

| AA | #1 | #2 | #3 | #4 | #5 | #6 | #7 | #8 | #9 | #10 | #11 | #12 | Expected |
|----|----|----|----|----|----|----|----|----|----|-----|-----|-----|----------|
| A  | 20 | 20 | 21 | 15 | 20 | 19 | 26 | 23 | 19 | 16  | 21  | 22  | 20 ± 8   |
| C  | 18 | 7  | 14 | 14 | 15 | 9  | 13 | 14 | 18 | 15  | 11  | 22  | 10 ± 6   |
| D  | 15 | 21 | 7  | 15 | 19 | 13 | 15 | 16 | 11 | 14  | 20  | 15  | 10 ± 6   |
| E  | 8  | 6  | 5  | 4  | 10 | 9  | 5  | 5  | 7  | 7   | 6   | 7   | 10 ± 6   |
| F  | 19 | 13 | 19 | 12 | 11 | 10 | 12 | 11 | 14 | 19  | 12  | 14  | 10 ± 6   |
| G  | 25 | 16 | 14 | 19 | 14 | 18 | 19 | 19 | 19 | 19  | 15  | 14  | 20 ± 8   |
| H  | 17 | 21 | 18 | 16 | 15 | 14 | 16 | 20 | 12 | 9   | 16  | 16  | 10 ± 6   |
| I  | 10 | 9  | 15 | 16 | 17 | 17 | 16 | 14 | 15 | 21  | 17  | 9   | 10 ± 6   |
| K  | 5  | 9  | 8  | 8  | 5  | 12 | 7  | 6  | 8  | 3   | 8   | 9   | 10 ± 6   |
| L  | 31 | 23 | 29 | 28 | 18 | 28 | 22 | 21 | 22 | 24  | 20  | 25  | 30 ± 10  |
| M  | 6  | 6  | 5  | 5  | 4  | 9  | 7  | 8  | 8  | 6   | 11  | 5   | 10 ± 6   |
| N  | 15 | 19 | 16 | 16 | 15 | 19 | 20 | 15 | 17 | 22  | 15  | 22  | 10 ± 6   |
| P  | 22 | 21 | 21 | 24 | 30 | 21 | 25 | 24 | 29 | 20  | 16  | 18  | 20 ± 8   |
| Q  | 9  | 5  | 2  | 6  | 9  | 6  | 4  | 4  | 7  | 11  | 7   | 4   | 10 ± 6   |
| R  | 24 | 15 | 20 | 21 | 21 | 21 | 27 | 21 | 22 | 26  | 28  | 22  | 30 ± 10  |
| S  | 27 | 25 | 31 | 45 | 33 | 32 | 28 | 31 | 31 | 32  | 35  | 27  | 30 ± 10  |
| T  | 16 | 22 | 32 | 22 | 25 | 28 | 17 | 22 | 21 | 22  | 27  | 23  | 20 ± 8   |
| V  | 17 | 33 | 16 | 18 | 26 | 19 | 15 | 18 | 20 | 17  | 15  | 28  | 20 ± 8   |
| W  | 5  | 9  | 8  | 3  | 3  | 7  | 7  | 6  | 2  | 4   | 4   | 8   | 10 ± 6   |
| Y  | 12 | 21 | 20 | 14 | 11 | 10 | 20 | 23 | 19 | 14  | 17  | 11  | 10 ± 6   |
