# Supplementary material for: Trinucleotide cassettes increase diversity of T7 phage-displayed peptide library
Source: PubMed Central journal article supplement (PMC2174457; doi:10.1186/1472-6750-7-65), 2007-10-05
Supplement: 1472-6750-7-65-S3.pdf [file 1472-6750-7-65-S3.pdf]

**Additional Table 3.** Observed positional amino acid frequencies for the 286-member T7 Trinuc library peptide population. Position 1 corresponds to the amino-terminus of the peptides. Expected positional amino acid frequencies were calculated based on amino acid codon frequency, which was 5% (1/20) for each amino acid using trinucleotide cassette randomization, and on the total number of peptides analyzed (5% x 286). Ranges for expected amino acid frequencies were calculated assuming Poisson statistics (square root of expected frequency %). Over-represented amino acids are highlighted in red, and under-represented amino acids are highlighted in blue.

| AA | #1 | #2 | #3 | #4 | #5 | #6 | #7 | #8 | #9 | #10 | #11 | #12 | Expected |
|----|----|----|----|----|----|----|----|----|----|-----|-----|-----|----------|
| A  | 10 | 13 | 10 | 14 | 11 | 12 | 16 | 17 | 8  | 14  | 11  | 14  | 14 ± 6   |
| C  | 7  | 9  | 3  | 7  | 13 | 9  | 10 | 9  | 5  | 6   | 9   | 8   | 14 ± 6   |
| D  | 9  | 13 | 14 | 16 | 13 | 8  | 11 | 10 | 6  | 13  | 11  | 13  | 14 ± 6   |
| E  | 17 | 26 | 21 | 16 | 27 | 28 | 23 | 21 | 24 | 24  | 25  | 21  | 14 ± 6   |
| F  | 11 | 6  | 11 | 7  | 8  | 8  | 5  | 8  | 5  | 8   | 10  | 11  | 14 ± 6   |
| G  | 13 | 9  | 15 | 12 | 5  | 11 | 11 | 12 | 16 | 18  | 9   | 10  | 14 ± 6   |
| H  | 10 | 18 | 16 | 22 | 14 | 17 | 24 | 13 | 14 | 24  | 21  | 14  | 14 ± 6   |
| I  | 10 | 8  | 10 | 11 | 10 | 11 | 9  | 15 | 10 | 12  | 10  | 11  | 14 ± 6   |
| K  | 5  | 9  | 11 | 10 | 10 | 19 | 10 | 11 | 11 | 15  | 16  | 19  | 14 ± 6   |
| L  | 7  | 7  | 13 | 10 | 8  | 4  | 6  | 5  | 12 | 12  | 8   | 7   | 14 ± 6   |
| M  | 30 | 14 | 17 | 17 | 24 | 16 | 15 | 16 | 14 | 18  | 17  | 14  | 14 ± 6   |
| N  | 8  | 13 | 11 | 10 | 10 | 9  | 11 | 15 | 4  | 13  | 15  | 9   | 14 ± 6   |
| P  | 12 | 19 | 19 | 15 | 17 | 28 | 20 | 17 | 21 | 12  | 10  | 11  | 14 ± 6   |
| Q  | 22 | 20 | 23 | 23 | 22 | 25 | 27 | 23 | 25 | 21  | 17  | 18  | 14 ± 6   |
| R  | 9  | 9  | 7  | 13 | 11 | 10 | 8  | 11 | 14 | 6   | 11  | 11  | 14 ± 6   |
| S  | 26 | 27 | 22 | 12 | 16 | 16 | 26 | 19 | 26 | 23  | 26  | 25  | 14 ± 6   |
| T  | 18 | 15 | 13 | 15 | 21 | 11 | 10 | 17 | 20 | 9   | 17  | 21  | 14 ± 6   |
| V  | 21 | 22 | 16 | 12 | 15 | 21 | 22 | 22 | 21 | 14  | 17  | 22  | 14 ± 6   |
| W  | 17 | 15 | 11 | 19 | 20 | 10 | 9  | 8  | 13 | 8   | 10  | 10  | 14 ± 6   |
| Y  | 24 | 14 | 23 | 25 | 11 | 13 | 13 | 17 | 17 | 16  | 16  | 17  | 14 ± 6   |
