# Supplementary material for: Trinucleotide cassettes increase diversity of T7 phage-displayed peptide library
Source: PubMed Central journal article supplement (PMC2174457; doi:10.1186/1472-6750-7-65), 2007-10-05
Supplement: 1472-6750-7-65-S4.pdf [file 1472-6750-7-65-S4.pdf]

**Additional Table 4: Streptavidin-binding peptides isolated from the T7 Trinuc library**

| <u>Sequence</u>                         | <u>Binding Frequency</u> | <u>Average OD650</u> |
|-----------------------------------------|--------------------------|----------------------|
| HEWVSYA <b>HPQ</b> FM                   | 1/30                     | 1.143                |
| QKDW <b>HPQ</b> FAWQ                    | 1/30                     | 1.143                |
| LFQSWW <b>DHPQ</b> N                    | 1/30                     | 1.135                |
| YFDWLH <b>HPQ</b> NA                    | 1/30                     | 1.121                |
| MIQW <b>SHPQ</b> FQW                    | 1/30                     | 1.117                |
| KSPWFK <b>HPQ</b> FC                    | 1/30                     | 1.114                |
| WLWYRE <b>HPQ</b> FS                    | 1/30                     | 1.079                |
| DWGI <b>IWEHPQ</b> FR                   | 1/30                     | 1.078                |
| PGPRYVL <b>HPQ</b> FQ                   | 1/30                     | 1.064                |
| LPTRSWF <b>HPQ</b> ND                   | 1/30                     | 1.047                |
| WRW <b>LQEHHPQ</b> FR                   | 1/30                     | 1.028                |
| WFEWPC <b>HPQ</b> FEV                   | 1/30                     | 0.925                |
| WWFTEN <b>HPQ</b> NGM                   | 1/30                     | 0.899                |
| WNPTCFY <b>HPQ</b> VQ                   | 1/30                     | 0.869                |
| IHANWAR <b>HPQ</b> NM                   | 1/30                     | 0.827                |
| WTFK <b>KHPQ</b> FQS                    | 1/30                     | 0.754                |
| GWPMQ <b>HPQ</b> NDMW                   | 1/30                     | 0.676                |
| WKEK <b>WNTVCC</b> TT                   | 5/30                     | 1.155                |
| LFINHVSE <b>WCC</b> II                  | 1/30                     | 1.056                |
| LK <b>W</b> NDRT <b>VCC</b> V           | 1/30                     | 0.949                |
| DGR <b>W</b> QLD <b>ACC</b> II          | 1/30                     | 0.914                |
| WHMQ <b>AEWQ</b> IC <b>CI</b>           | 1/30                     | 0.909                |
| KTKFK <b>QPNRCC</b> V                   | 1/30                     | 0.868                |
| YWMDTIPD <b>WF</b> HM                   | 1/30                     | 1.060                |
| MQ <b>HP</b> AWL <b>AY</b> YH           | 1/30                     | 0.956                |
| VQ <b>FV</b> EG <b>W</b> MF <b>LE</b> H | 1/30                     | 0.321                |
| Media                                   |                          | 0.041                |
| T7 10-3b                                |                          | 0.041                |

Library screening and streptavidin-binding phage ELISAs performed as described in Krumpe *et al.*, *Proteomics* 2006, 6, 4210-4222.
